# Supplementary material for: Enhanced reduction of CO to C2 products on MoS2 nanoribbons by edge engineering
Source: Royal Society of Chemistry journal article supplement (doi:10.1039/d4ta05552g), 2024-01-01
Supplement: d4ta05552g1.pdf [file d4ta05552g1.pdf]

## Supporting Information

### Enhanced reduction of CO to C<sub>2</sub> products on MoS<sub>2</sub> nanoribbon by edge engineering

Jiangke Tao<sup>1</sup>, Di Liu<sup>1</sup>, Zhichao Yu<sup>1</sup>, and Hui Pan<sup>1,2\*</sup>

<sup>1</sup>Institute of Applied Physics and Materials Engineering, University of Macau, Macao SAR, China

<sup>2</sup>Department of Physics and Chemistry, Faculty of Science and Technology, University of Macau, Macao SAR, China

\*To whom correspondence should be addressed: [huipan@um.edu.mo](mailto:huipan@um.edu.mo)

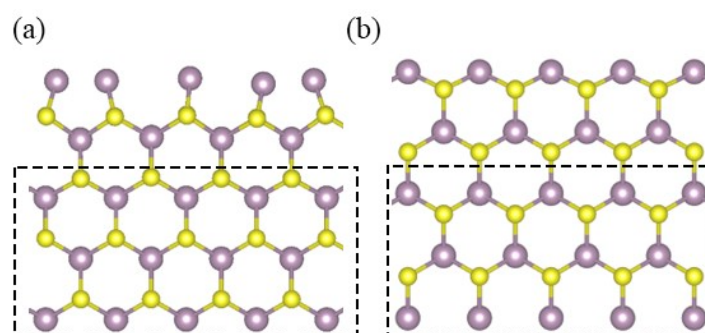

Fig.S1 (a) and (b) Two edge structures of MoS<sub>2</sub> terminated with Mo atoms after structural relaxation. The dashed boxes show the fixed atoms.

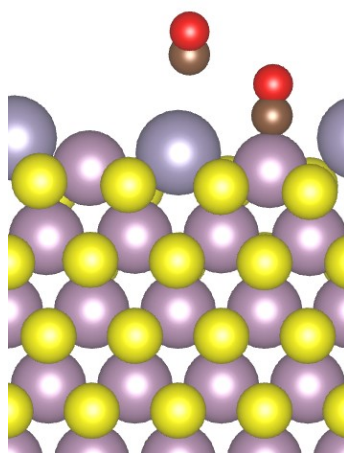

Fig.S2 The optimized structure with two CO adsorbed on the Sn-incorporated edge.





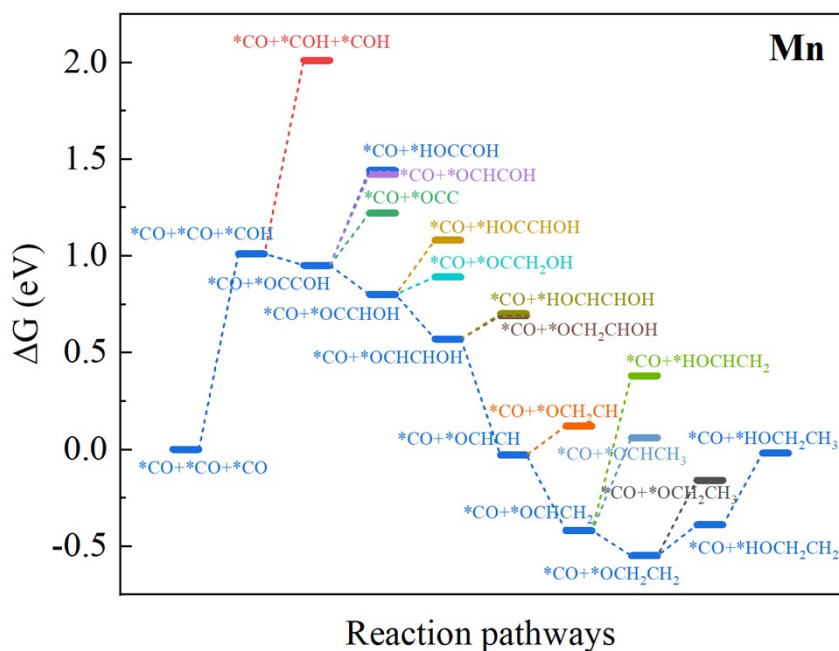

Fig.S7 The reduction pathways of CO on the Mn-incorporated edge.

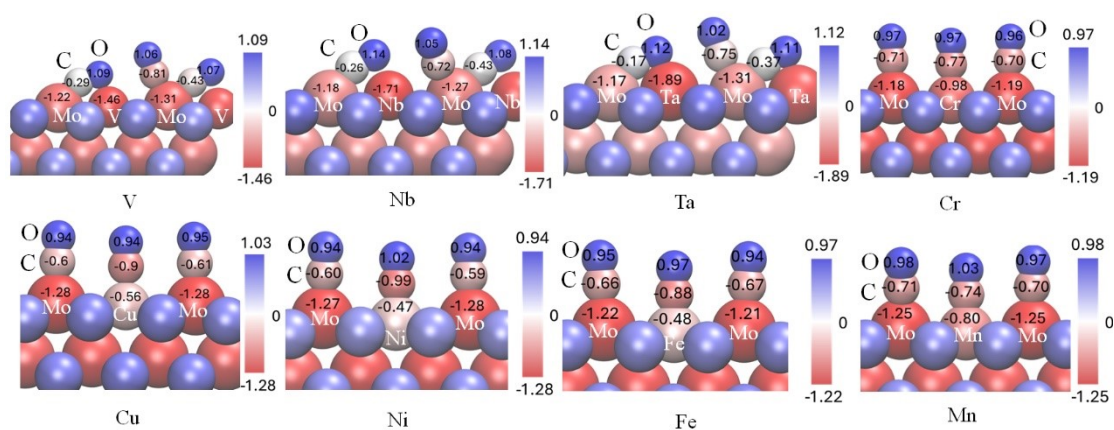

Fig.S8 Charge transfer for the adsorbed CO and active sites at the incorporated edges as obtained from the Bader charge analysis.

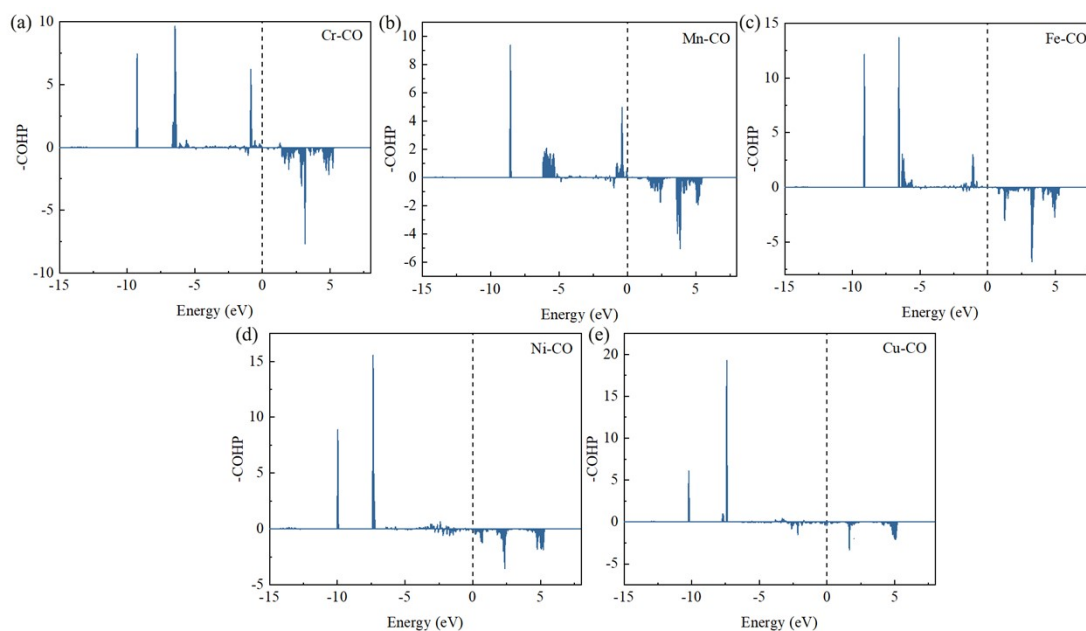

Fig.S9 (a)-(e) The crystal orbital Hamiltonian populations (COHPs) of C atom in adsorbed CO on the dopant site and the dopant.

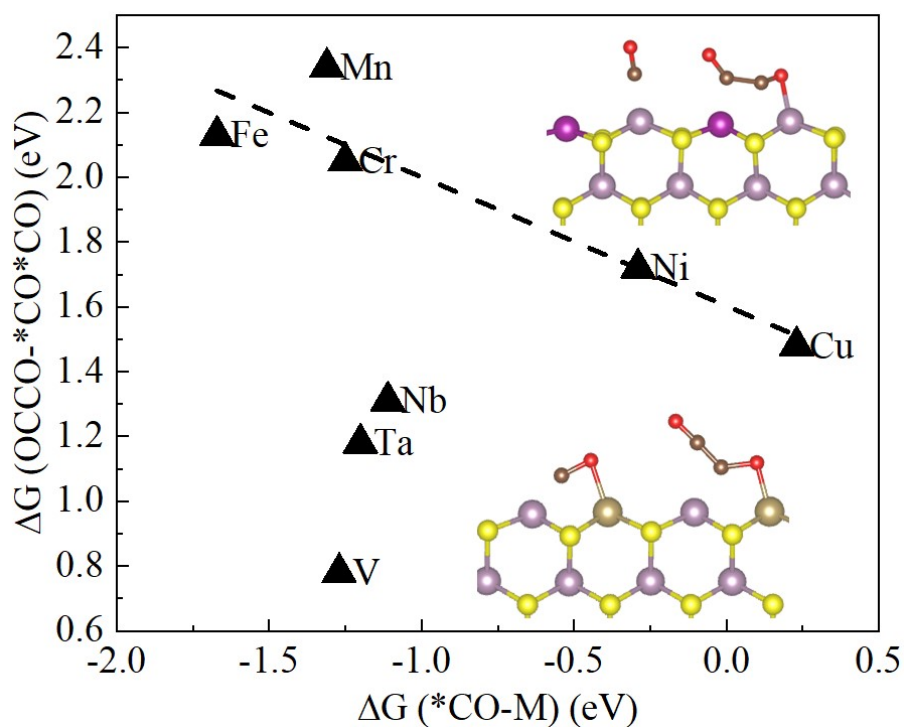

Fig.S10 The Gibbs free energy changes for the coupling of CO molecules adsorbed on the neighboring asymmetric active sites of the different incorporated edges, and the adsorption of CO on the dopant sites.

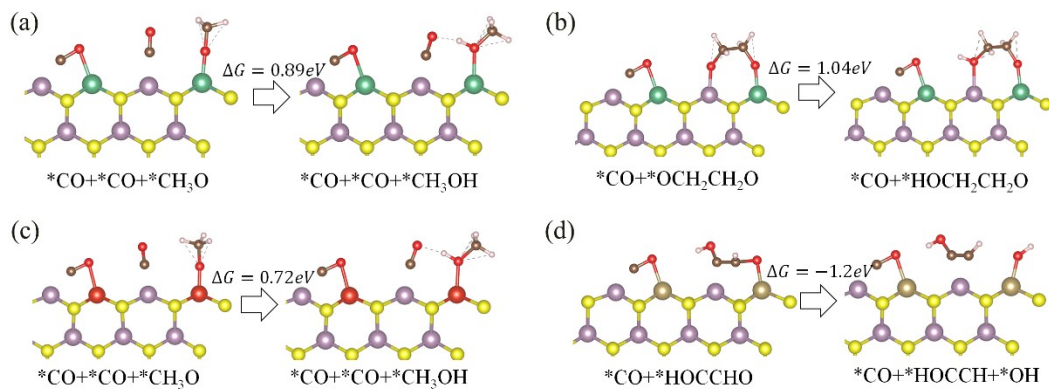

Fig.S11 The hydrogenation of (a)  $*\text{CH}_3\text{O}$  on the Nb site, (b)  $*\text{OCH}_2\text{CH}_2\text{O}$  on the Nb-incorporated edge, (c)  $*\text{CH}_3\text{O}$  on the V site, and (d)  $*\text{HOCCHO}$  on the Ta-incorporated edge.
